# Supplementary material
Source: Springer Nature journal article supplement (https://www.springermedizin.de/resource/supplementary/12974_2011_432_MOESM5_ESM.pdf/9601280)

**A**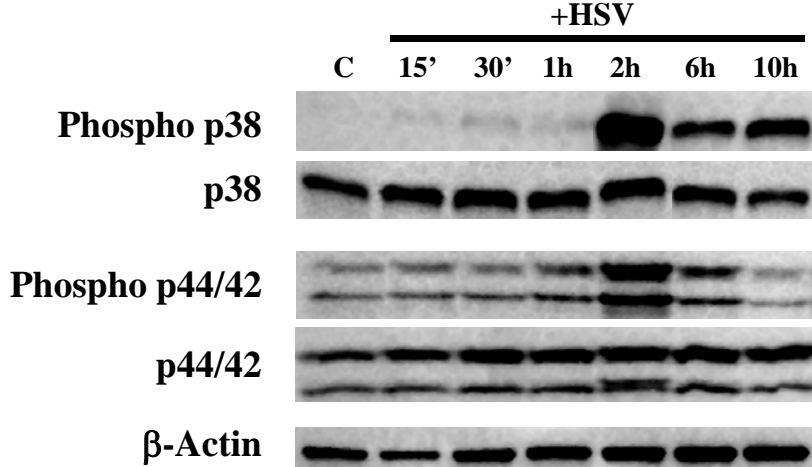**B**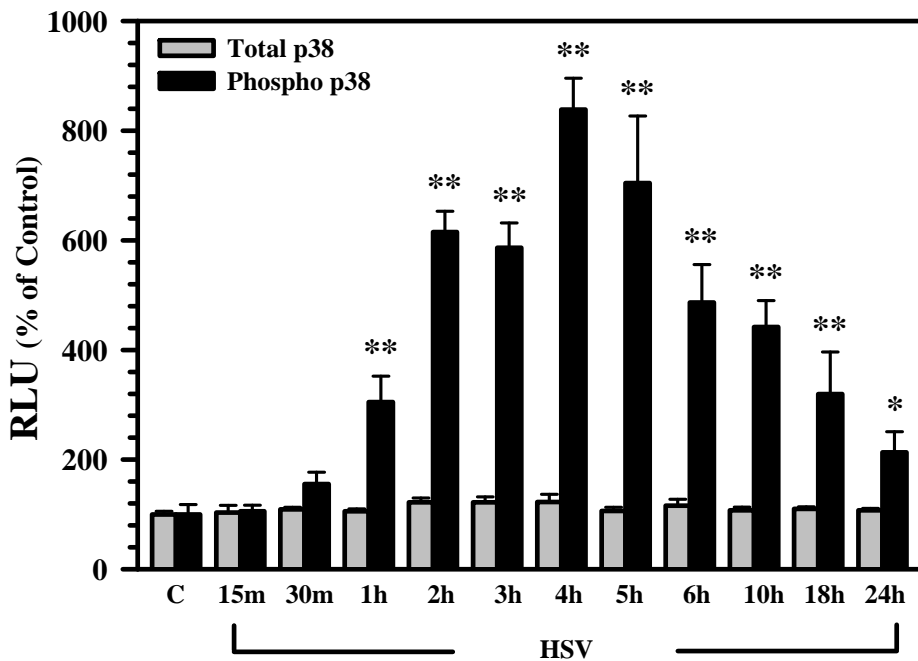

Supplement: MOESM5 [file 9601280]
